# Supplementary material for: Adjunctive Use of Phage Sb-1 in Antibiotics Enhances Inhibitory Biofilm Growth Activity versus Rifampin-Resistant Staphylococcus aureus Strains
Source: PubMed Central journal article supplement (PMC7692760; doi:10.3390/antibiotics9110749), 2020-10-29
Supplement: antibiotics-09-00749-s001.pdf [file antibiotics-09-00749-s001.pdf]

## Supplementary Materials

# Adjunctive Use of Phage Sb-1 to Antibiotics Enhances Inhibitory Biofilm Growth Activity versus Rifampin-resistant *Staphylococcus aureus* strains

Lei Wang <sup>1,2,†</sup>, Tamta Tkhilaishvili <sup>1,2,†</sup> and Andrej Trampuz <sup>1,2,\*</sup>

<sup>1</sup> Center for Musculoskeletal Surgery, Charité—Universitätsmedizin Berlin, Corporate Member of Freie Universität Berlin, Humboldt-Universität zu Berlin and Berlin Institute of Health, 13353 Berlin, Germany; lei.wang@charite.de (L.W.); tamta.tkhilaishvili@charite.de (T.T.)

<sup>2</sup> Berlin-Brandenburg Center for Regenerative Therapies, Charité—Universitätsmedizin Berlin, 13553 Berlin, Germany

\* Correspondence: andrej.trampuz@charite.de; Tel.: +49-30-450-615-073

† These authors contributed equally to this work.

**Table S1.** Synergistic inhibitory effects of simultaneous and staggered exposure of phage-rifampin combination.

| Strains   | RIF (SIM) |              |
|-----------|-----------|--------------|
|           | MBIC      | FBIC         |
| MRSA ATCC | 64        | 0.25 (S)     |
| MRSA 1    | > 256     | > 0.25* (NS) |
| MRSA 2    | > 256     | > 0.25* (NS) |
| MSSA 3    | > 256     | > 0.25* (NS) |
| MSSA 4    | > 256     | > 0.25* (NS) |
| MSSA 5    | > 256     | > 0.25* (NS) |
| Strains   | RIF (STA) |              |
|           | MBIC      | FBIC         |
| MRSA ATCC | 8         | 0.03 (S)     |
| MRSA 1    | > 256     | > 0.25* (NS) |
| MRSA 2    | > 256     | > 0.25* (NS) |
| MSSA 3    | > 256     | > 0.25* (NS) |
| MSSA 4    | > 256     | > 0.25* (NS) |
| MSSA 5    | >256      | > 0.25* (NS) |

Abbreviation: DOX, doxycycline; LEV, levofloxacin; LNZ, linezolid; CLI, clindamycin. MBIC, minimum biofilm inhibitory concentration (values are expressed in  $\mu\text{g}/\text{mL}$ ). FBIC, fractional biofilm inhibitory concentration; in brackets is shown the interpretation, S: Synergism; NS: No-Synergism. \*MBIC of the single antibiotic was considered equal to 1024  $\mu\text{g}/\text{mL}$  for MBICphage/MBICalone ratio calculations.
